# Supplementary material for: Intersectional, anterograde transsynaptic targeting of neurons receiving monosynaptic inputs from two upstream regions
Source: PubMed Central journal article supplement (PMC8860993; doi:10.1038/s42003-022-03096-3), 2022-02-21
Supplement: 42003_2022_3096_MOESM7_ESM.pdf [file 42003_2022_3096_MOESM7_ESM.pdf]

## File checklist

Should you have any questions regarding this checklist, please contact the relevant *Communications* journal.

| Files                             |                                                                                                  |                                                  |                                              |                                                                                                                                                                                                                                                                                                                                                                                                                                                                                                                                                                                                                                                                                                                                                                                                                                                                                                                                                                                                                                                                                                                                                                                                                                                                                   |                          |
|-----------------------------------|--------------------------------------------------------------------------------------------------|--------------------------------------------------|----------------------------------------------|-----------------------------------------------------------------------------------------------------------------------------------------------------------------------------------------------------------------------------------------------------------------------------------------------------------------------------------------------------------------------------------------------------------------------------------------------------------------------------------------------------------------------------------------------------------------------------------------------------------------------------------------------------------------------------------------------------------------------------------------------------------------------------------------------------------------------------------------------------------------------------------------------------------------------------------------------------------------------------------------------------------------------------------------------------------------------------------------------------------------------------------------------------------------------------------------------------------------------------------------------------------------------------------|--------------------------|
| Item                              | Permissible file format                                                                          | File name on manuscript tracking system          | File type on manuscript tracking system      | Notes                                                                                                                                                                                                                                                                                                                                                                                                                                                                                                                                                                                                                                                                                                                                                                                                                                                                                                                                                                                                                                                                                                                                                                                                                                                                             |                          |
| Editorial Requests Table          | .doc, .docx                                                                                      | Editorial Requests Table                         | Related Manuscript File                      | Please provide a copy of the Editorial Requests Table supplied with our decision letter, with all changes made in response to our requests detailed in the right-hand column.                                                                                                                                                                                                                                                                                                                                                                                                                                                                                                                                                                                                                                                                                                                                                                                                                                                                                                                                                                                                                                                                                                     | <input type="checkbox"/> |
| Cover letter (optional)           | .doc, .docx, .pdf                                                                                | Cover letter                                     | Author Cover Letter                          | Outline any additional changes to the manuscript.                                                                                                                                                                                                                                                                                                                                                                                                                                                                                                                                                                                                                                                                                                                                                                                                                                                                                                                                                                                                                                                                                                                                                                                                                                 | <input type="checkbox"/> |
| Author responses                  | .doc, .docx, .pdf                                                                                | Response to Referees                             | Rebuttal Letter                              | Provide your point-by-point response to any issues raised by our reviewers (please include the reviewers' comments in this document).                                                                                                                                                                                                                                                                                                                                                                                                                                                                                                                                                                                                                                                                                                                                                                                                                                                                                                                                                                                                                                                                                                                                             | <input type="checkbox"/> |
| Article File                      | .doc, .docx, .tex                                                                                | Article File                                     | Article (NOT revised manuscript - marked up) | Main manuscript file must be in Microsoft Word or LaTeX format.<br><br>LaTeX and Tex article source files must be accompanied by the compiled PDF for reference. The bibliography must be submitted separately (as a .bib file) or contained within the .tex file.                                                                                                                                                                                                                                                                                                                                                                                                                                                                                                                                                                                                                                                                                                                                                                                                                                                                                                                                                                                                                | <input type="checkbox"/> |
| Main Figure File(s)               | .psd, .ai, .eps, .tiff, .jpg, .pdf, .ps, .gif, .ppt, .pptx, .png, .bmp, .vsd, .cdx, .svg or .emf | Figure 1, Figure 2, etc.                         | Figure                                       | Each Figure must be provided as a separate file at a minimum resolution of 300 dpi at final size. Figures must be supplied whole, with all panels included in a single document. Figures appear at 9 or 18 cm width (1 or 2 columns respectively).<br><br>Captions must not be included in the Figure files. Figure captions must instead be included within the main manuscript file, grouped together at the end of the document.<br><br>Figures must be in file type .psd, .ai, .eps, .tiff, .jpg, .pdf, .ps, .gif, .ppt, .pptx, .png, .bmp, .vsd, .cdx, .svg or .emf. We recommend using <a href="#">vectorgraphic formats</a> as these lead to higher resolution figures.<br><br>We strongly discourage the use or adaptation of previously published images (including figures from the literature, stock photos, clip art or commercial satellite and map data), but if this is unavoidable, you must request the necessary rights documentation to re-use such material from the relevant copyright holders and submit this to us alongside your manuscript. An appropriate permissions statement must be present in the relative figure caption for any third-party images.<br><br>If individuals are identifiable in images, their written permission must be provided. | <input type="checkbox"/> |
| Main Table(s)                     | .doc, .docx, .tex                                                                                | Article File                                     | Article                                      | Included within the main Article File in word-editable format.<br><br>Tables should be grouped together at the end of the main manuscript file.                                                                                                                                                                                                                                                                                                                                                                                                                                                                                                                                                                                                                                                                                                                                                                                                                                                                                                                                                                                                                                                                                                                                   | <input type="checkbox"/> |
| Boxes (Reviews/Perspectives only) | .doc, .docx, .tex                                                                                | Box 1, Box 2, etc.                               | Article                                      | Included in the main Article File in word-editable format, or uploaded as a separate Word or TeX file under the file type 'Article'.                                                                                                                                                                                                                                                                                                                                                                                                                                                                                                                                                                                                                                                                                                                                                                                                                                                                                                                                                                                                                                                                                                                                              | <input type="checkbox"/> |
| Supplementary Information         | .pdf                                                                                             | Supplementary Information                        | Supplemental Material                        | Any Supplementary Figures, Tables, Methods, Notes, Discussion and References must be provided in a single separate file in PDF format.<br><br>We recommend limiting the size of your Supplementary Information file to 50MB.<br><br>** Please note that Supplementary Information cannot be changed after the paper has been accepted **                                                                                                                                                                                                                                                                                                                                                                                                                                                                                                                                                                                                                                                                                                                                                                                                                                                                                                                                          | <input type="checkbox"/> |
| Supplementary Data                | .csv, .xlsx, .txt, .zip, .cif                                                                    | Supplementary Data 1, Supplementary Data 2, etc. | Data Sets                                    | Any Supplementary Data files should be supplied separately and should be labelled as Supplementary Data 1, etc. Legends for these should be given in the Editorial Requests Table (and not in the main Supplementary Information file).<br><br>We recommend limiting the size of each Supplementary file to 50MB.<br><br>** Please note that Supplementary Information cannot be changed after the paper has been accepted **                                                                                                                                                                                                                                                                                                                                                                                                                                                                                                                                                                                                                                                                                                                                                                                                                                                     | <input type="checkbox"/> |

| Item                            | Permissible file format                                                  | File name on manuscript tracking system                  | File type on manuscript tracking system | Notes                                                                                                                                                                                                                                                                                                                                                                                                                                                                                                                                                                                                                                                                                                                                                                                                                                                                                       |                          |
|---------------------------------|--------------------------------------------------------------------------|----------------------------------------------------------|-----------------------------------------|---------------------------------------------------------------------------------------------------------------------------------------------------------------------------------------------------------------------------------------------------------------------------------------------------------------------------------------------------------------------------------------------------------------------------------------------------------------------------------------------------------------------------------------------------------------------------------------------------------------------------------------------------------------------------------------------------------------------------------------------------------------------------------------------------------------------------------------------------------------------------------------------|--------------------------|
| Supplementary Audio             | .avi, .mp2, .wav, .mp3                                                   | Supplementary Audio 1, Supplementary Audio 2, etc.       | Supplemental Material                   | Any Supplementary Audio files should be supplied separately and should be labelled as Supplementary Audio 1, etc. Legends for these should be given in the Editorial Requests Table (and not in the main Supplementary Information file).<br><br>We recommend limiting the size of each Supplementary file to 50MB.<br><br>** Please note that Supplementary Information cannot be changed after the paper has been accepted **                                                                                                                                                                                                                                                                                                                                                                                                                                                             | <input type="checkbox"/> |
| Supplementary Movies            | .mp4, .mpeg, .flv, .3gp, .m4v, .mts, .mxf, .mpg, .mov, .m2p, .gif, .wmv, | Supplementary Movie 1, Supplementary Movie 2, etc.       | Video                                   | Any Supplementary Movie files should be supplied separately and should be labelled as Supplementary Movie 1, etc. Legends for these should be given in the Editorial Requests Table (and not in the main Supplementary Information file).<br><br>We recommend limiting the size of each Supplementary file to 50MB.<br><br>** Please note that Supplementary Information cannot be changed after the paper has been accepted **                                                                                                                                                                                                                                                                                                                                                                                                                                                             | <input type="checkbox"/> |
| Supplementary Software          | .zip                                                                     | Supplementary Software 1, Supplementary Software 2, etc. | Supplemental Material                   | Any Supplementary Software files should be supplied separately and should be labelled as Supplementary Software 1, etc. Legends for these should be given in the Editorial Requests Table (and not in the main Supplementary Information file).<br><br>Supplementary Software must be supplied as a ZIP file.<br><br>We recommend limiting the size of each Supplementary file to 50MB.<br><br>** Please note that Supplementary Information cannot be changed after the paper has been accepted **                                                                                                                                                                                                                                                                                                                                                                                         | <input type="checkbox"/> |
| Life sciences reporting summary | .pdf                                                                     | Reporting Summary                                        | Supplemental Material                   | For life science manuscripts, a final version of the life sciences reporting summary.<br><a href="https://www.nature.com/documents/nr-reporting-summary.pdf">https://www.nature.com/documents/nr-reporting-summary.pdf</a><br><br>The reporting summary will be published alongside your manuscript and therefore it needs to accurately represent your work. Please take a close look at the reporting summary and make sure that everything is completed correctly. In the section "Reporting for specific materials, systems and methods", you need to tick a box for each item, according to whether or not it applies, which will result in irrelevant sections becoming hidden. In the subsequent sections no box should be left blank or completed as N/A, including when the response is negative. Also, please make sure to include your name and date at the top of the document. | <input type="checkbox"/> |
| Solar cells reporting summary   | .pdf                                                                     | Solar cells reporting summary                            | Supplemental Material                   | For solar cell manuscripts, a final version of the solar cells reporting summary.<br><a href="https://www.nature.com/documents/nr-photovoltaic-reporting.pdf">https://www.nature.com/documents/nr-photovoltaic-reporting.pdf</a>                                                                                                                                                                                                                                                                                                                                                                                                                                                                                                                                                                                                                                                            | <input type="checkbox"/> |
| Lasing reporting summary        | .pdf                                                                     | Lasing reporting summary                                 | Supplemental Material                   | For lasing manuscripts, a final version of the lasing reporting summary.<br><a href="https://www.nature.com/documents/nr-lasing-reporting.pdf">https://www.nature.com/documents/nr-lasing-reporting.pdf</a>                                                                                                                                                                                                                                                                                                                                                                                                                                                                                                                                                                                                                                                                                 | <input type="checkbox"/> |
| Editorial policy checklist      | .pdf                                                                     | Editorial policy checklist                               | Related Manuscript File                 | For all primary research articles, a final version of the editorial policy checklist.<br><a href="https://www.nature.com/documents/nr-editorial-policy-checklist.zip">https://www.nature.com/documents/nr-editorial-policy-checklist.zip</a><br>Please note that this form is a dynamic 'smart pdf' and must therefore be downloaded and completed in Adobe Reader. Clicking this link will download a zip file containing the pdf.                                                                                                                                                                                                                                                                                                                                                                                                                                                         | <input type="checkbox"/> |
| Suggested feature image         | .jpg, .pdf, .gif, .tiff, .psd                                            | Featured image                                           | Related Manuscript File                 | If you wish, an interesting image (but not an illustration or schematic) for consideration as a 'Featured Image' on the journal homepage. The file should be 1200x675 pixels in RGB format and should be uploaded as 'Related Manuscript File'. In addition to our home page, we may also use this image (with credit) in other journal-specific promotional material. If you submit a suggested featured image, please also include a completed <a href="#">image License to Publish form</a> (also upload as 'Related Manuscript File', with file name 'Featured image LTP').                                                                                                                                                                                                                                                                                                             | <input type="checkbox"/> |
